# Supplementary material
Source: PubMed Central journal article supplement (PMC8508102)
Supplement: jb.00277-21-s0001.pdf [file jb.00277-21-s0001.pdf]

## SUPPLEMENTAL MATERIAL

### Supplemental Figures

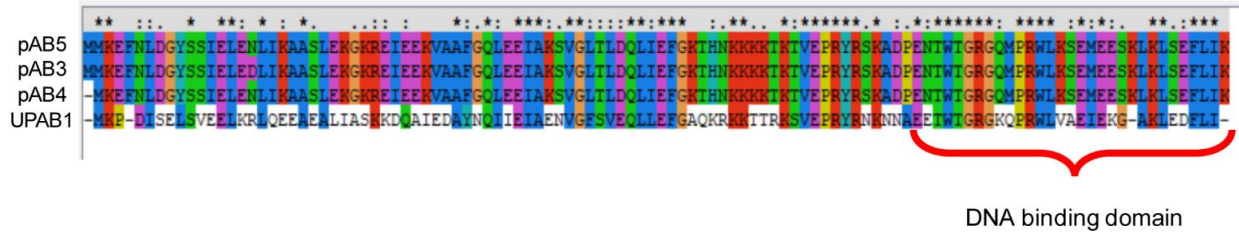

**Figure S1. The H-NS regulator encoded in pAB5 is 100% identical to the H-NS encoded in other LCPs. Amino acids alignment of the H-NS regulators encoded in the LCPs pAB5, pAB3 and pAB4 and the H-NS encoded in UPAB1 chromosome.**

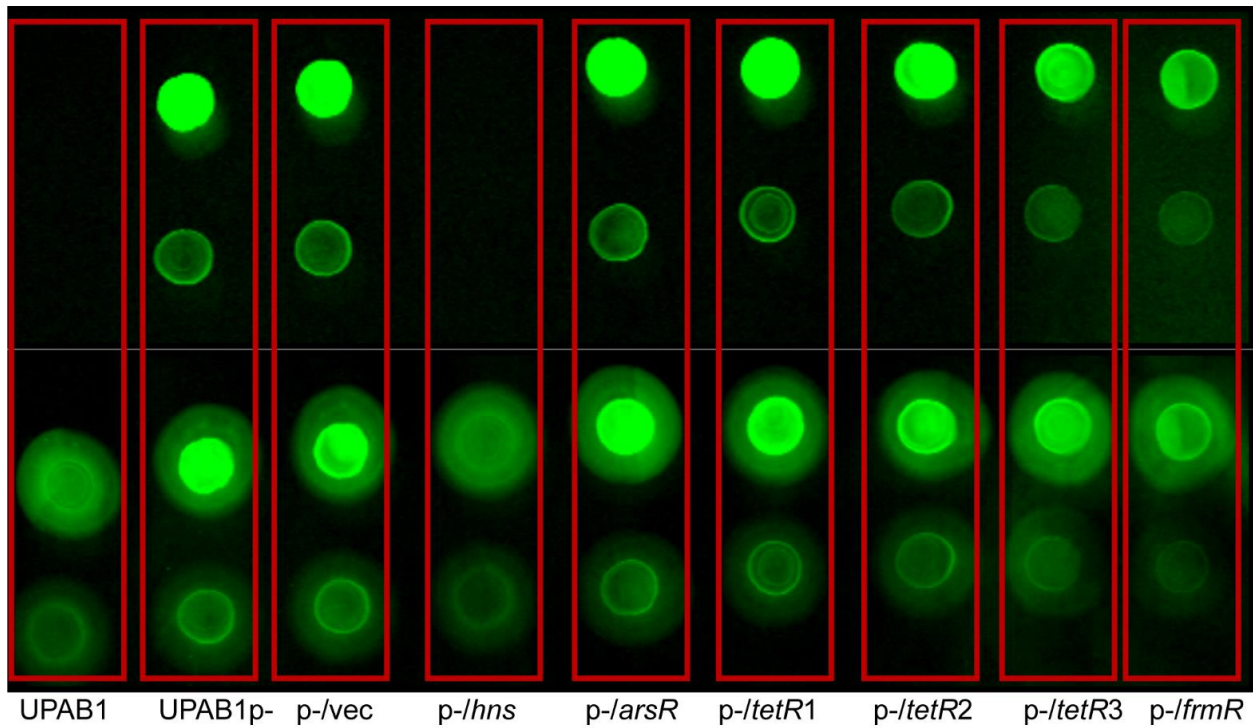

**Figure S2. H-NS reduce PNAG production.** UPAB1, UPAB1p-, and UPAB1p- empty vector (p-/vec) or the vector expressing the pAB5 regulators. Immunoblots using antibodies anti-PNAG (A) and antibodies anti-UPAB1 as loading control (B). Cells were taken from overnight LB-agar plates incubated at 26 °C and adjusted to OD 1.

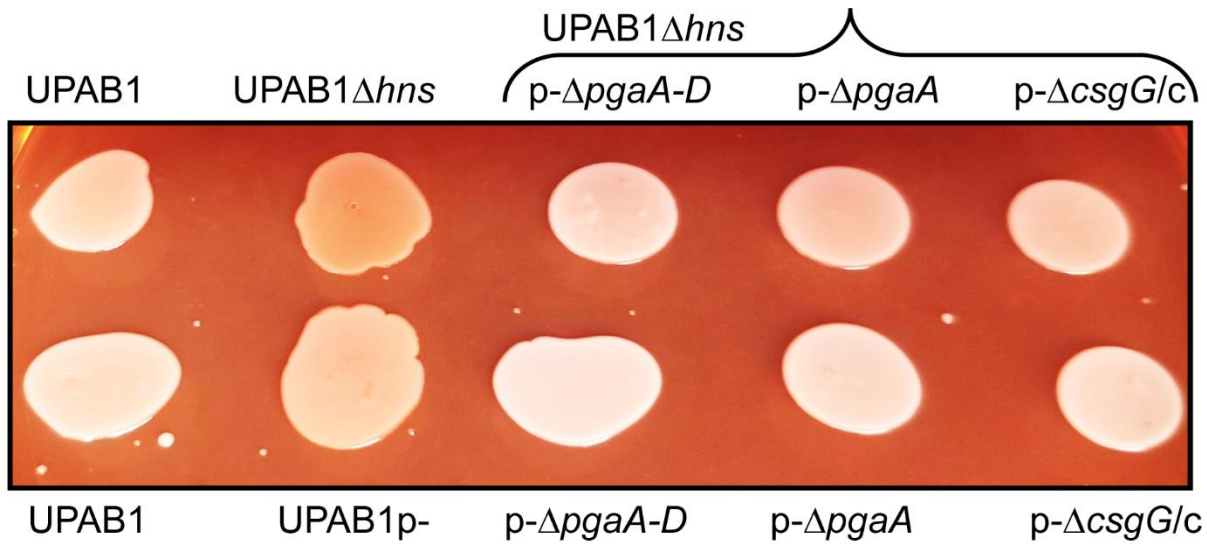

**Figure S3. PgaA-D and CsgG like clusters are involved in Congo-red binding.** Deletions of *pgaA-D*, *pgaA* and *csgG* were made in UPAB1 $\Delta$ *hns* background (top panel) and UPAB1p- background. Cells were incubated for 48 hours at 26°C on YESCA-Congo-red agar plates.

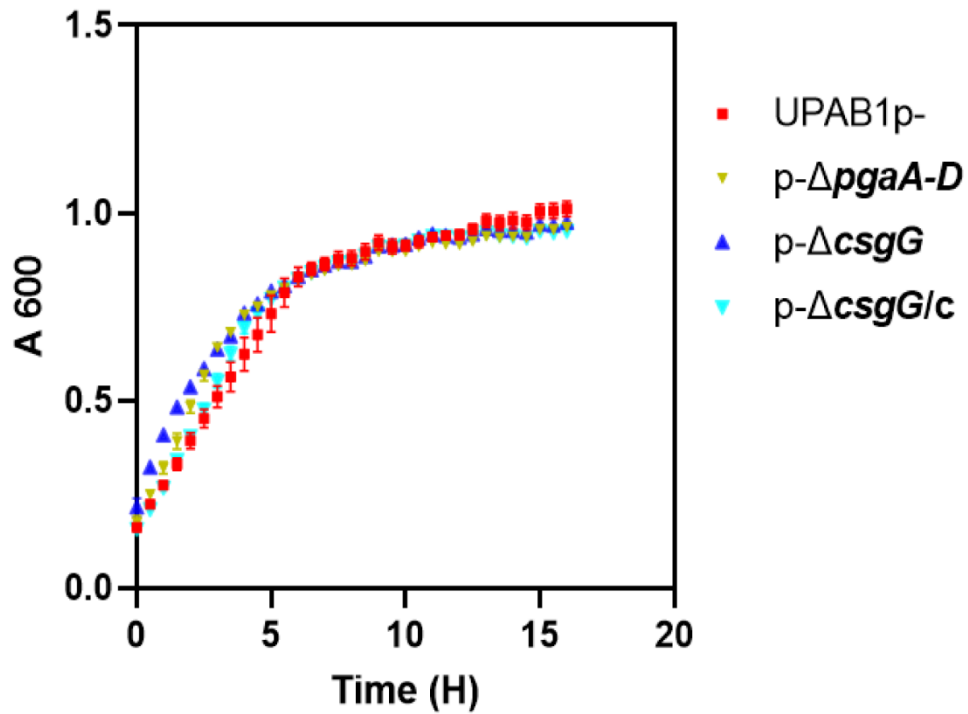

FigureS4.

**Growth curves of UPAB1p- and derivative mutant strains in YESCA-DMSO media,** measured by OD600. The graphs represent the mean and standard deviation of three replicates.

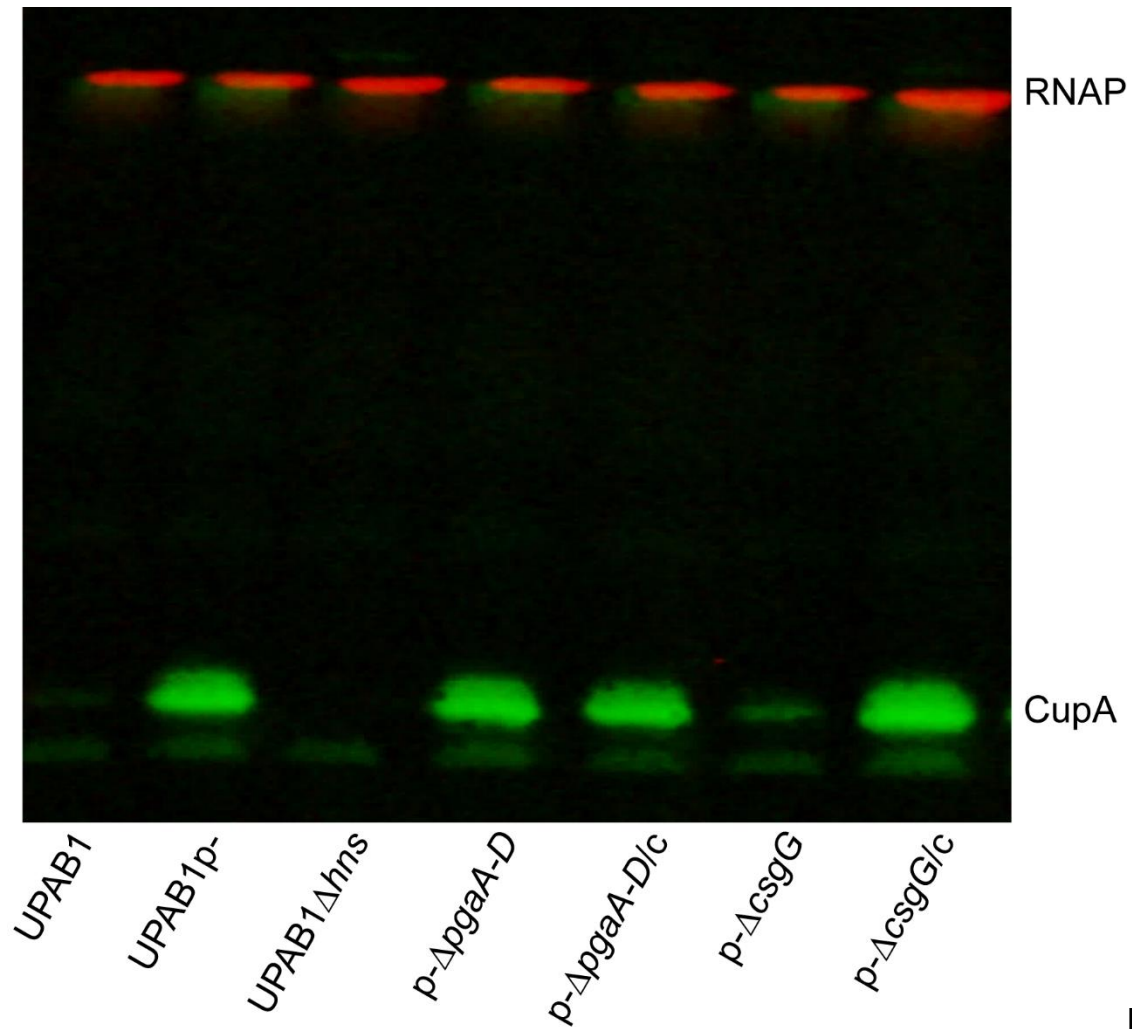

**Figure**

**S5. pAB5 inhibits CUP pili formation.** Western blot of OD-normalized whole cell. Western blot probing for CupA (the Usher protein from Cup 2 pili). RNAP is included as loading control.

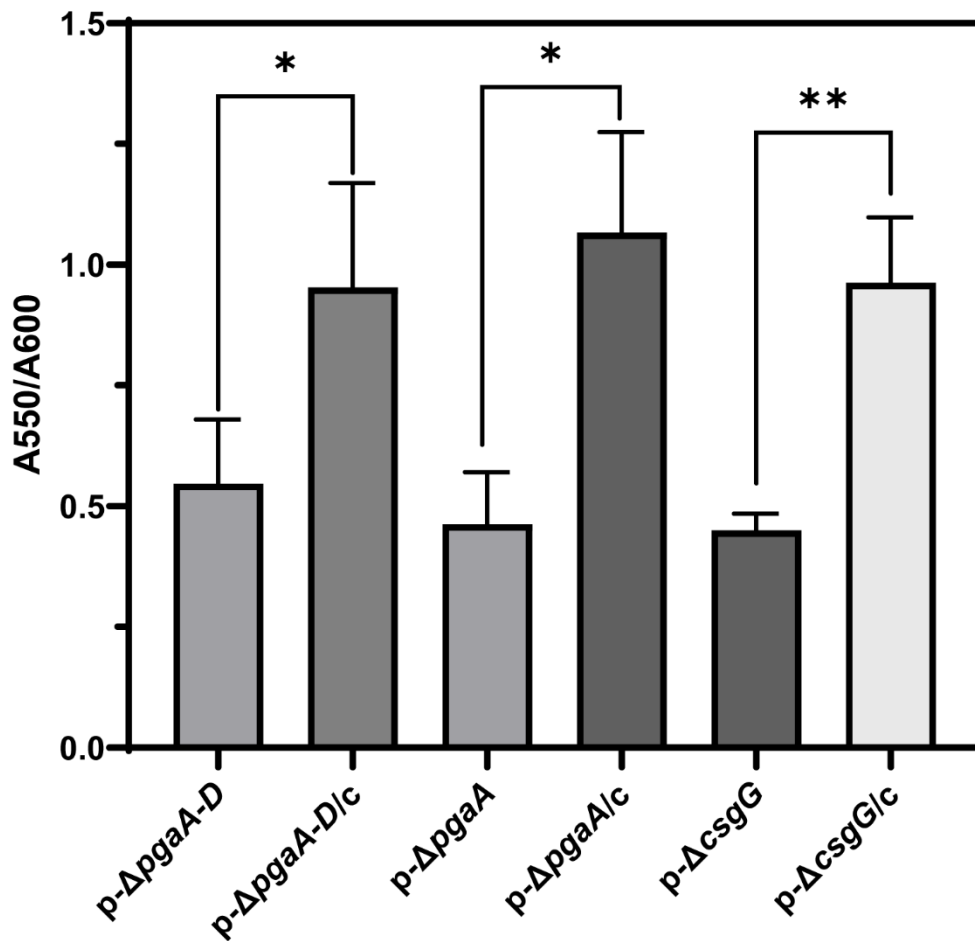

**Figure S6. Biofilm formation in UPAB1p- mutants and complemented strains.** Cells were grown for 8 hours on LB broth at 37°C under static conditions. Biofilm formation was measured by the crystal violet binding and normalized to the OD600. The values represent the mean and standard deviations from three independent experiments. Statistical analysis by t test was performed by comparison with the pAB5- strain (\*\*  $p \leq 0.005$ , \*  $p \leq 0.05$ ).

**Table S1. List of regulators identified in pAB5**

| Accession number | Description                                                      | Protein name |
|------------------|------------------------------------------------------------------|--------------|
| D1G37_RS18580    | H-NS histone family protein                                      | H-NS         |
| D1G37_RS18620    | TetR/AcrR family transcriptional regulator                       | TetR1        |
| D1G37_RS18650    | TetR/AcrR family transcriptional regulator                       | TetR2        |
| D1G37_RS18810    | TetR family transcriptional regulator                            | TetR3        |
| D1G37_RS18815    | ArsR family transcriptional regulator                            | ArsR         |
| D1G37_RS18965    | metal/formaldehyde-sensitive family<br>transcriptional regulator | FrmR         |

**Table S2. Bacterial strains used in this study.**

| Strain                                        | Relevant properties                                                | Reference  |
|-----------------------------------------------|--------------------------------------------------------------------|------------|
| UPAB1                                         | MDR Urine isolate with pAB5 plasmid                                | (1)        |
| UPAB1p- (p-)                                  | UPAB1 derivative strain without pAB5                               | (1)        |
| UPAB1 $\Delta$ <i>hns</i>                     | UPAB1 containing an unmarked <i>hns</i> deletion                   | this study |
| p-/vec                                        | UPAB1p- containing the pVRL2 expression vector                     | this study |
| p-/hns                                        | p- expressing <i>hns</i> in pVRL2                                  | this study |
| p-/tetR1                                      | p- expressing <i>tetR1</i> in pVRL2                                | this study |
| p-/tetR2                                      | p- expressing <i>tetR2</i> in pVRL2                                | this study |
| p-/tetR3                                      | p- expressing <i>tetR3</i> in pVRL2                                | this study |
| p-/arsR                                       | p- expressing <i>arsR</i> in pVRL2                                 | this study |
| p-/frmR                                       | p- expressing <i>frmR</i> in pVRL2                                 | this study |
| p- $\Delta$ <i>pgaA-D</i>                     | p- containing an unmarked <i>pgaA-D</i> deletion                   | this study |
| p- $\Delta$ <i>pgaA</i>                       | p- containing an unmarked <i>pgaA</i> deletion                     | this study |
| p- $\Delta$ <i>csgG</i>                       | p- containing an unmarked <i>csgG</i> deletion                     | this study |
| p- $\Delta$ Ab 12600                          | p- containing an unmarked D1G37_12600 deletion                     | this study |
| p+ $\Delta$ <i>hns</i> $\Delta$ <i>pgaA-D</i> | UPAB1 containing an unmarked <i>hns</i> and <i>pgaA-D</i> deletion | this study |
| p+ $\Delta$ <i>hns</i> $\Delta$ <i>pgaA</i>   | UPAB1 containing an unmarked <i>hns</i> and <i>pgaA</i> deletion   | this study |
| p+ $\Delta$ <i>hns</i> $\Delta$ <i>csgG</i>   | UPAB1 containing an unmarked <i>hns</i> and <i>csgG</i> deletion   | this study |
| p- $\Delta$ <i>pgaA-D/c</i>                   | p- $\Delta$ <i>pgaA-D</i> complemented                             | this study |
| p- $\Delta$ <i>pgaA/c</i>                     | p- $\Delta$ <i>pgaA</i> complemented                               | this study |
| p- $\Delta$ <i>csgG/c</i>                     | p- $\Delta$ <i>csgG</i> complemented                               | this study |



**Table S3. Bacterial plasmids used in this study.**

| Plasmid                        | Relevant properties                                         | Reference   |
|--------------------------------|-------------------------------------------------------------|-------------|
| pVRL2                          | Expression vector in <i>Acinetobacter</i> , Gm <sup>r</sup> | (2)         |
| pVRL2/ <i>hns</i>              | pVRL2 containing <i>hns</i>                                 | this study  |
| pVRL2/ <i>tetR1</i>            | pVRL2 containing <i>tetR1</i>                               | this study  |
| pVRL2/ <i>tetR2</i>            | pVRL2 containing <i>tetR2</i>                               | this study  |
| pVRL2/ <i>tetR3</i>            | pVRL2 containing <i>tetR3</i>                               | this study  |
| pVRL2/ <i>arsR</i>             | pVRL2 containing <i>arsR</i>                                | this study  |
| pVRL2/ <i>frmR</i>             | pVRL2 containing <i>frmR</i>                                | this study  |
| pAT03H                         | pMMB67EH with FLP recombinase, Hyg <sup>r</sup>             | Feldman lab |
| pAT04H                         | pMMB67EH with RecAb recombinase, Hyg <sup>r</sup>           | Feldman lab |
| pUCT18T-miniTn7-Gm             | mobilizable mini-Tn7 vector, Gm <sup>r</sup>                | (3)         |
| pUCT18T-miniTn7- <i>pgaA-D</i> | for $\Delta$ <i>pgaA-D</i> complementation                  | this study  |
| pUCT18T-miniTn7- <i>pgaA</i>   | for $\Delta$ <i>pgaA</i> complementation                    | this study  |
| pUCT18T-miniTn7- <i>csgG</i>   | for $\Delta$ <i>csgG</i> complementation                    | this study  |
| pTNS2                          | Tn7 transposase-expressing helper plasmid, Amp <sup>r</sup> | (4)         |
| pRK2013                        | RK2 derivative, Kmr, self-transmissible                     | (5)         |
| pET28 a+                       | Kmr                                                         | Novagen     |
| pET28 a-CupA                   | pET28a+ expressing <i>cupA</i> from UPAB1                   | this study  |

**Table S4. Oligonucleotides used in this study.**

| Name                                             | Sequence <sup>a</sup>                                | gene target          |
|--------------------------------------------------|------------------------------------------------------|----------------------|
| <b><u>Cloning in pVRL2 (gene expression)</u></b> |                                                      |                      |
| HNS xhoI Fw                                      | CCG <b>CTCGAG</b> ATGATGAAAGAATTTAATTTAG             | <i>hns</i>           |
| HNS pstI Rv                                      | AAA <b>ACTGCAG</b> TTATTTAATCAGGAATTCACTCA           |                      |
| <i>tetR1</i> xhoI Fw                             | CCG <b>CTCGAG</b> ATGACAAATAAAGCTTCACAGC             | <i>tetR1</i>         |
| <i>tetR1</i> pstI Rv                             | AAA <b>ACTGCAG</b> TCAAATTGCTCACCATATAAA             |                      |
| <i>tetR2</i> xhoI Fw                             | CCG <b>CTCGAG</b> ATGACTAAAGTTATTTCAAAAA             | <i>tetR2</i>         |
| <i>tetR2</i> pstI Rv                             | AAA <b>ACTGCAG</b> TTAAGCCTCAAATGTCTGAATTA           |                      |
| <i>tetR3</i> xhoI Fw                             | CCG <b>CTCGAG</b> ATGATGTCTAGATTAGATAAAAGTA          | <i>tetR3</i>         |
| <i>tetR3</i> pstI Rv                             | AAA <b>ACTGCAG</b> TTAAGACCCACTTTTACATTT             |                      |
| <i>arsR</i> xhoI Fw                              | CCG <b>CTCGAG</b> ATGGGGATCTCCTTAAACCATG             | <i>arsR</i>          |
| <i>arsR</i> pstI Rv                              | AAA <b>ACTGCAG</b> TTAATGTGAAAGTGGGTCTTA             |                      |
| <i>frmR</i> xhoI Fw                              | CCG <b>CTCGAG</b> ATGCCTAATCAGGTTGAAGACAA            | <i>frmR</i>          |
| <i>frmR</i> pstI Rv                              | AAA <b>ACTGCAG</b> CTATTTTAAATATGATTTTAGA            |                      |
| <b><u>Mutant construction</u></b>                |                                                      |                      |
| Hns2 FP1                                         | AATTCGAGCTCGGTACCCGGGGATCAACA<br>GATGATTCTATATACGATT | <i>hns</i> deletion  |
| Hns2 RP1                                         | AGCAGCTCCAGCCTACACAATCGCTTAAT<br>ACTCTATATGTTTTAA    | <i>hns</i> deletion  |
| Hns2 FP3                                         | AGGAACTAAGGAGGATATTCATATGTGAT<br>GTATAAAAAAAGCCTA    | <i>hns</i> deletion  |
| Hns2 RP3                                         | GCCTGCAGGTCGACTCTAGAGGATCCG<br>GCAAGCGCATGCGGTGATT   | <i>hns</i> deletion  |
| <i>pgaA</i> Up Fw                                | AATTCGAGCTCGGTACCCGGGGATCGCT<br>AATTGTTTTAAGTCCATA   | <i>pgaA</i> deletion |

<sup>a</sup>Engineered restriction enzyme sites are indicated in bold.

**Table S4. Oligonucleotides used in this study (continued).**

| Name                              | Sequence <sup>a</sup>                                   | gene target   |
|-----------------------------------|---------------------------------------------------------|---------------|
| <b><u>Mutant construction</u></b> |                                                         |               |
| <i>pgaA</i> Up Rv deletion        | AGCAGCTCCAGCCTACACAATCGCTGGC                            | <i>pgaA</i>   |
| <i>pgaA</i> Dw Fw deletion        | AGCTATCACGGACATGGC<br>TAGGAACTAAGGAGGATATTCATATGAGTT    | <i>pgaA</i>   |
| <i>pgaA</i> Dw Rv deletion        | TGTCCTGCTCTATAAT<br>GCCTGCAGGTCGACTCTAGAGGATCTAAT       | <i>pgaA</i>   |
| pnag Up Fw deletion               | CTGGATGTGTTTGAAGG<br>AATTCGAGCTCGGTACCCGGGGATCGAAC      | <i>pgaA-D</i> |
| pnag Up Rv deletion               | ACGGCAGAACAACCTTTCT<br>AGCAGCTCCAGCCTACACAATCGCTTATGG   | <i>pgaA-D</i> |
| pnag Dw Fw deletion               | TCAGTACCGAATCATT<br>TAGGAACTAAGGAGGATATTCATATTATAAT     | <i>pgaA-D</i> |
| pnag Dw Rv deletion               | TTTGAATAGCTTGCT<br>GCCTGCAGGTCGACTCTAGAGGATCTAATC       | <i>pgaA-D</i> |
| 12595 FP1 deletion                | TGGATGTGTTTGAAGG<br>GAATTCGAGCTCGGTACCCGGGGATCGGT       | <i>csgG</i>   |
| 12595 RP1 deletion                | AGCCTCTACCTATTGGAT<br>AGCAGCTCCAGCCTACACAATCGCTGTTTA    | <i>csgG</i>   |
| 12595 FP3 deletion                | CTCTATAAAGATAAATAAAT<br>AATAGGAACTAAGGAGGATATTCATATGTTT | <i>csgG</i>   |
| 12595 RP3 deletion                | TGGATATGTGTTAGATGA<br>GCCTGCAGGTCGACTCTAGAGGATCAACAA    | <i>csgG</i>   |
| 12600 FP1 deletion                | GTT TTTTCTCACCTGTCC<br>GAATTCGAGCTCGGTACCCGGGGATCCATAT  | Ab12600       |

|                       |                                                                             |                  |
|-----------------------|-----------------------------------------------------------------------------|------------------|
| 12600 RP1<br>deletion | AATTA <b>ACTATCTATAGA</b> AATAA<br>AGCAGCTCCAGCCTACACAATCGCTCTAACA          | Ab12600          |
| 12600 FP3             | CATATCCAAAATTATTGAA<br>AATAGGAACTAAGGAGGATATTCATATGATG<br>ATTAAGAACTTCTCATT | Ab12600 deletion |
| 12600 RP3             | GCCTGCAGGTCGACTCTAGAGGATCGTAA<br>ATACCGTTTTAAACGGAAG                        | Ab12600 deletion |

---

<sup>a</sup>Engineered restriction enzyme sites are indicated in bold.

**Table S4. Oligonucleotides used in this study (continued).**

| Name                                                     | Sequence <sup>a</sup>                                            | gene target                           |
|----------------------------------------------------------|------------------------------------------------------------------|---------------------------------------|
| <b><u>pUC18TminiTn7T-Gm (strain complementation)</u></b> |                                                                  |                                       |
| <i>pgaA</i> Fw hind3                                     | CTGCAGGAATTCCTCGAG <b>AAGCTT</b> GGGT<br>TAAGTCAATTATTTATTTTAACC | <i>pgaA/pgaA-D</i><br>complementation |
| <i>pgaA</i> Rv kpni                                      | GCAAGGCCTTCGCGAG <b>GGTACCGGG</b> TTT<br>T TGGTAAATCTTTTTCTA     | <i>pgaA</i>                           |
| complementation<br>pnag Rv kpni                          | GCAAGGCCTTCGCGAG <b>GGTACCGGG</b> TCA<br>TTTCAAATCATATCGAGT      | <i>pgaA-D</i>                         |
| complementation<br>12595 Fw hind3                        | CTGCAGGAATTCCTCGAG <b>AAGCTT</b> GGGA<br>AGTTGAGCTATTGTCCTCTG    | <i>csgG</i>                           |
| complementation<br>12595 Rv kpni                         | CCTGCAAGGCCTTCGCGAG <b>GGTACCGGG</b><br>TTTGATGAGTATAAGTTCCCC    | <i>csgG</i><br>complementation        |
| Tn7R<br>GlmS1 UPAB1                                      | CACAGCATAACTGGACTGATTC<br>TTTGCTGATGAAAATAGCGG                   | miniTn7T<br>insertion                 |
| <b><u>RT-PCR</u></b>                                     |                                                                  |                                       |
| RT <i>rpoB</i> F                                         | CTAACGGTGTGCCGGTAGAT                                             | <i>rpoB</i>                           |
| RT <i>rpoB</i> R                                         | TCTTGCTCACCGCCTACTTT                                             |                                       |
| RT 510 F                                                 | GCTTGTCCACCATCCGTA                                               | <i>pgaA</i>                           |
| RT 510 R                                                 | AAGACCGTGAAATGGAAACG                                             |                                       |
| RT 505 F                                                 | CCTTGTTTACGCGCTTCTTC                                             | <i>pgaB</i>                           |
| RT 505 R                                                 | GCTGTGCCTTGATCTCAACA                                             |                                       |
| RT 500 F                                                 | AAAAGGCTGCATAAGCCAAA                                             |                                       |
| <i>pgaC</i>                                              |                                                                  |                                       |
| RT 500 R                                                 | ACAGCACTGCCGAAATTCTT                                             |                                       |
| RT 12595 F                                               | GGGCAGGCGAAAATCTTCT                                              | <i>csgG</i>                           |
| RT 12595 R                                               | CCGCGTCCTAAAATACCAAA                                             |                                       |

RT 12600 F

TTCTT**GCGATGAGTTTGGTG**

Ab12600

RT 12600 R

AGCTAGGCCCTTACCTTTGG

---

<sup>a</sup>Engineered restriction enzyme sites are indicated in bold.

## Bibliography

1. Di Venanzio G, Flores-Mireles AL, Calix JJ, Haurat MF, Scott NE, Palmer LD, Potter RF, Hibbing ME, Friedman L, Wang B, Dantas G, Skaar EP, Hultgren SJ, Feldman MF. 2019. Urinary tract colonization is enhanced by a plasmid that regulates uropathogenic *Acinetobacter baumannii* chromosomal genes. *Nat Commun* 10:1100.
2. Lucidi M, Visaggio D, Prencipe E, Imperi F, Rampioni G, Cincotti G, Leoni L, Visca P. 2019. New shuttle vectors for real-time gene expression analysis in multidrug-resistant *Acinetobacter* species: In vitro and in vivo responses to environmental stressors. *Appl Environ Microbiol* 85.
3. Kumar A, Dalton C, Cortez-Cordova J, Schweizer HP. 2010. Mini-Tn7 vectors as genetic tools for single copy gene cloning in *Acinetobacter baumannii*. *J Microbiol Methods* 82:296–300.
4. Choi KH, Gaynor JB, White KG, Lopez C, Bosio CM, Karkhoff-Schweizer RR, Schweizer HP. 2005. A Tn7-based broad-range bacterial cloning and expression system. *Nat Methods* 2:443–448.
5. Figurski DH, Helinski DR. 1979. Replication of an origin-containing derivative of plasmid RK2 dependent on a plasmid function provided in trans. *Proc Natl Acad Sci U S A* 76:1648–52.
